# Supplementary material for: Modeling gene expression regulatory networks with the sparse vector autoregressive model
Source: Springer Nature journal article supplement (doi:10.1186/1752-0509-1-39), 2007-08-30

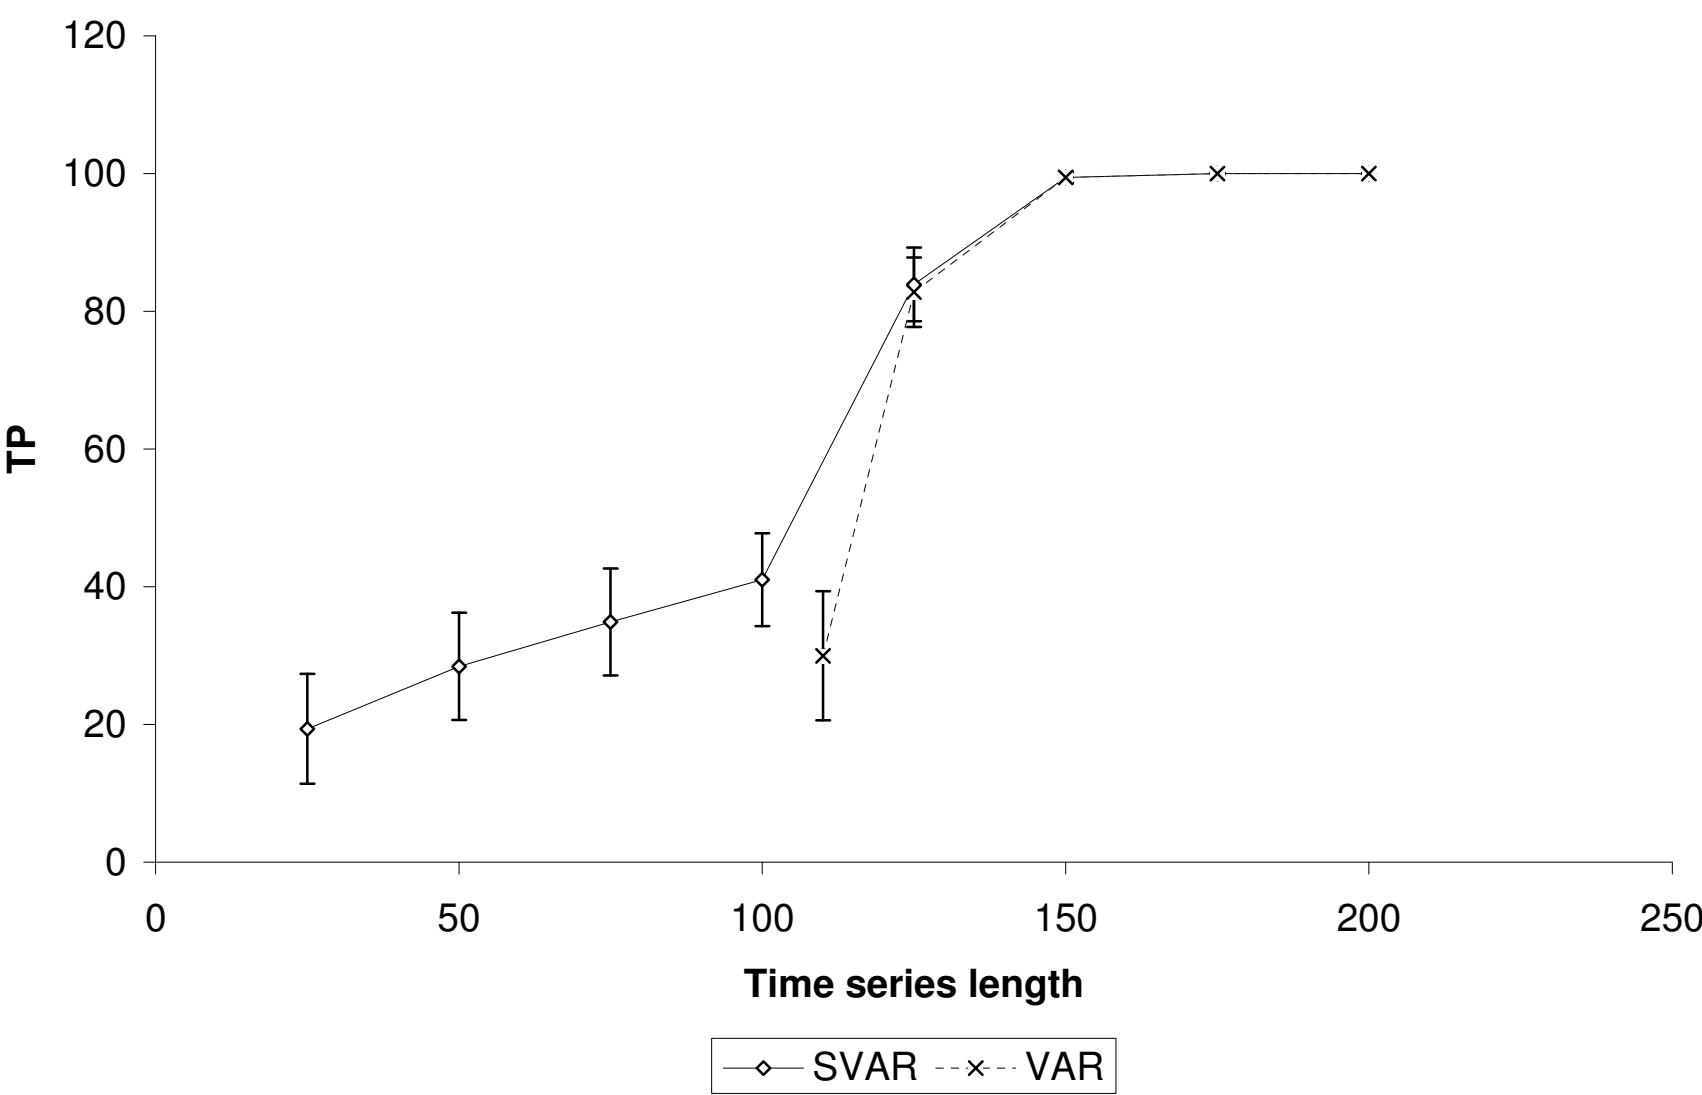

Supplement: 12918_2007_39_MOESM4_ESM.pdf [file 12918_2007_39_MOESM4_ESM.pdf]
